# Supplementary material
Source: PubMed Central journal article supplement (PMC5938131)

**Table E1 – Baseline characteristics of the study population**

|                                                   | GERD<br>(n = 28) | PPI-REE<br>(n = 9) | EoE<br>cases<br>(n = 24) | Controls<br>(n = 32) |
|---------------------------------------------------|------------------|--------------------|--------------------------|----------------------|
| Mean age ( $\pm$ SD)                              | 3.7 $\pm$ 2.1    | 7.6 $\pm$ 5.5      | 4.0 $\pm$ 2.8            | 12.0 $\pm$ 4.9       |
| Males (n, %)                                      | 21 (75)          | 8 (89)             | 22 (92)                  | 13 (41)              |
| White (n, %)                                      | 23 (82)          | 8 (89)             | 23 (96)                  | 19 (59)              |
| Atopic conditions (n, %)                          |                  |                    |                          |                      |
| Asthma                                            | 13 (46)          | 4 (44)             | 10 (42)                  | 0 (0)                |
| Eczema                                            | 4 (14)           | 2 (22)             | 11 (46)                  | 2 (6)                |
| Seasonal allergies                                | 12 (43)          | 2 (22)             | 11 (46)                  | 1 (3)                |
| Food allergies                                    | 4 (14)           | 3 (33)             | 14 (58)                  | 1 (3)                |
| Peak eosinophil counts (mean<br>eos/hpf $\pm$ SD) |                  |                    |                          |                      |
| Baseline                                          | 0.9 $\pm$ 2.1    | 53.9 $\pm$ 45.0    | 54 $\pm$ 33.2            | 0                    |
| Post-treatment                                    | --               | 1.9 $\pm$ 2.9      | 2.2 $\pm$ 3.3            | --                   |

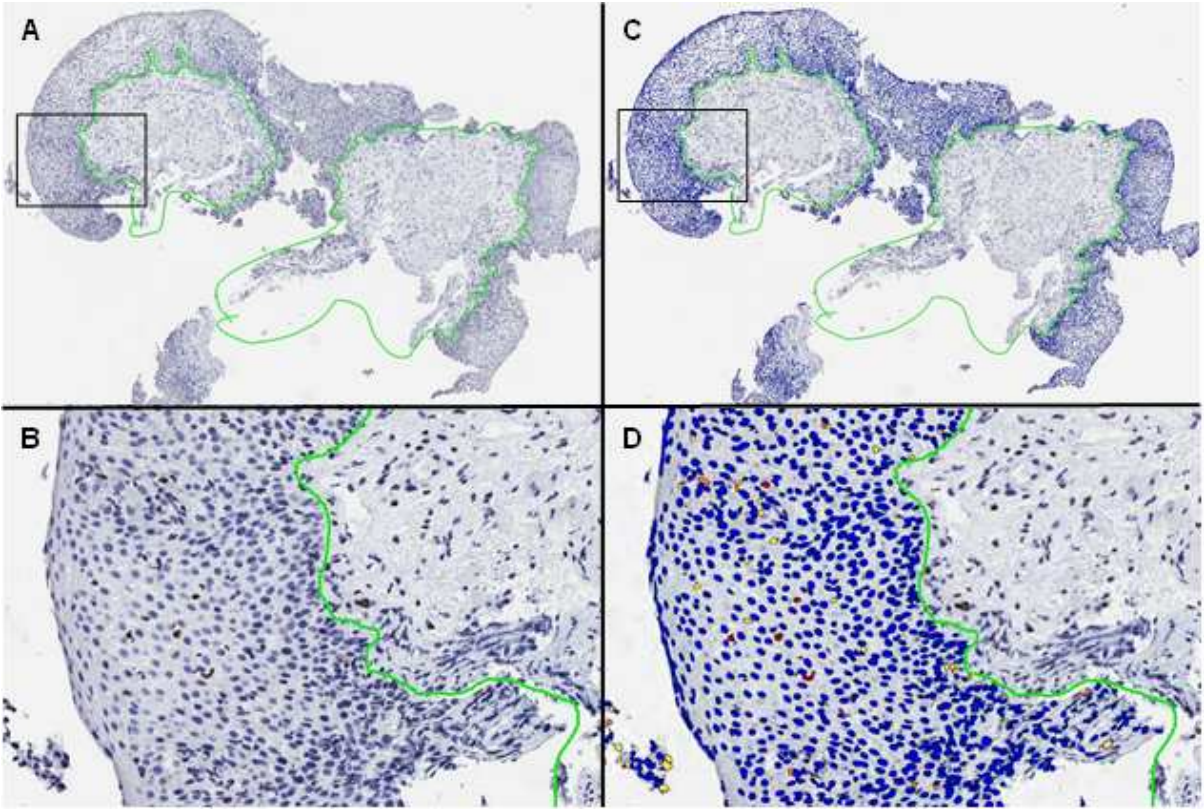

**A**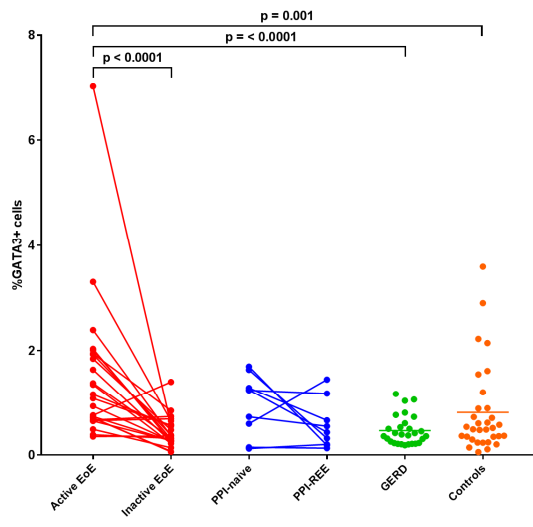**B**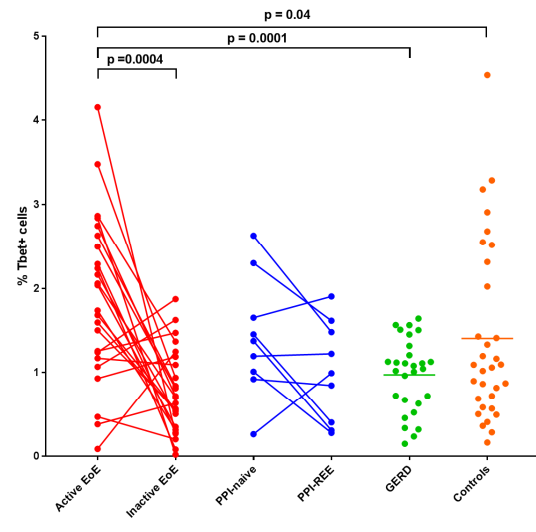

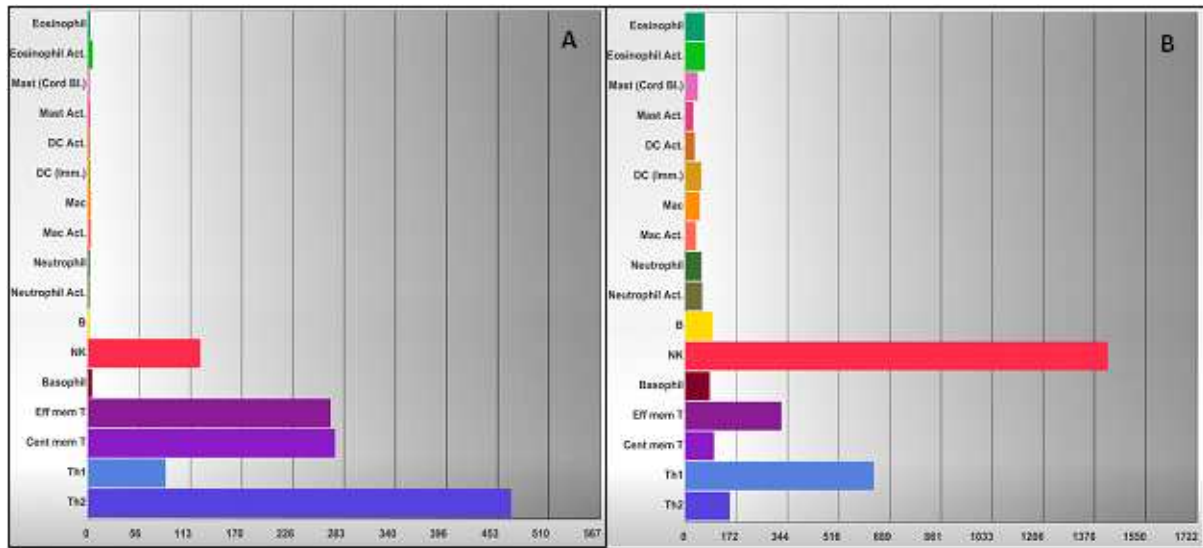

Supplement: NIHMS937690-supplement-supplement_1.pdf [file NIHMS937690-supplement-supplement_1.pdf]
